# Supplementary material for: Exosomes Released from CaSR‐Stimulated PMNs Reduce Ischaemia/Reperfusion Injury
Source: Hindawi journal article supplement (doi:10.1155/2021/3010548), 2021-01-01
Supplement: f1 [file 3010548.f1.docx]

**Supplementary Figure**

**Protein expression and SOD and MAD detection in AMI and I/R models**

Next, we tested the expression of Bcl-2 and Bax in myocardial tissue when AMI and I/R occurred. The results showed that the expression of Bax increased and Bcl-2 expression decreased. In addition, the ratio of Bcl-2 to Bax decreased much more significantly after AMI and I/R (Fig.A). We also detected that the concentration of superoxide dismutase (SOD) decreased and the secretion of malondialdehyde (MDA) increased in serum after AMI and I/R (Fig. B).

**
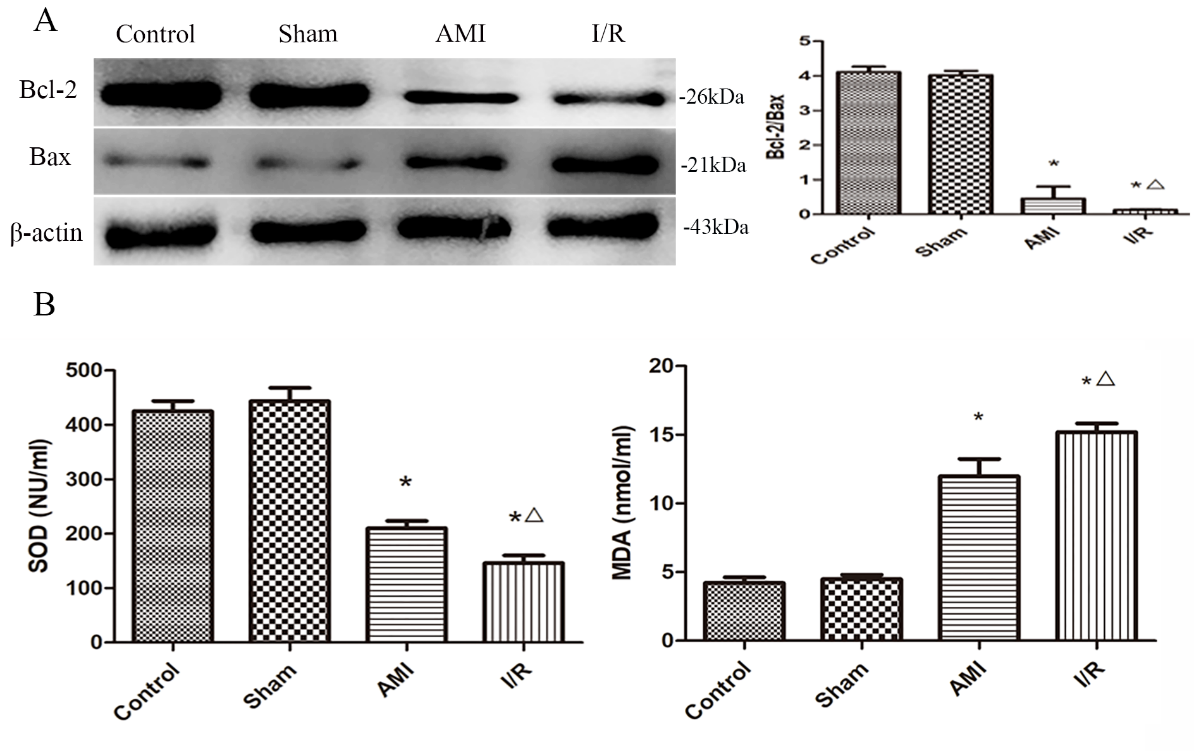
**

**Supplementary Figure.** Protein expression in rat cardiac tissues in response to AMI and I/R. (A) After myocardial tissue ischaemia (24 hours) and reperfusion (30 min), the expression of Bcl-2 decreased, but Bax expression increased. (B) The levels of SOD decreased, and MDA increased in the serum. Data are shown as the means ± SD; *P < 0.05 vs. the sham group，ΔP < 0.05 vs. the AMI group. Data are from three independent experiments.
